# Supplementary material for: Nonspecific stress response to temperature increase in Gammarus lacustris Sars with respect to oxygen-limited thermal tolerance concept
Source: PeerJ. 2018 Sep 17;6:e5571. doi: 10.7717/peerj.5571 (PMC6147124; doi:10.7717/peerj.5571)
Supplement: Supplemental Information 1 [file peerj-06-5571-s001.xlsx]

## Sheet: Diene conjugates
	Diene conjugates														Diene conjugates
	phospholipids														neutral lipids
Control 7°C	9°C	11°C	13°C	15°C	17°C	19°C	21°C	23°C	25°C	27°C	29°C	31°C	33°C		Control 7°C	9°C	11°C	13°C	15°C	17°C	19°C	21°C	23°C	25°C	27°C	29°C	31°C	33°C
Gkl019S2	Gl1019S7	Gl2019S5	Gl3019S6	Gl4019S2	Gl5019S1	Gl6019S3	Gl7019S3	Gl8019S3	Gl9019S8	Gl10019S7	Gl11019S7	Gl12019S6	Gl13019S3		Gkl019S2	Gl1019S3	Gl2019S5	Gl3019S6	Gl4019S2	Gl5019S1	Gl6019S3	Gl7019S3	Gl8019S3	Gl9019S8	Gl10019S7	Gl11019S7	Gl12019S6	Gl13019S3
Gkl019S1	Gl1019S3	Gl2019S1	Gl3019S4	Gl4019S3	Gl5019S4	Gl6019S2	Gl7019S1	Gl8019S8	Gl9019S2	Gl10019S6	Gl11019S2	Gl12019S7	Gl13019S1		Gkl019S1	Gl1019S2	Gl2019S1	Gl3019S4	Gl4019S3	Gl5019S4	Gl6019S2	Gl7019S1	Gl8019S8	Gl9019S2	Gl10019S6	Gl11019S2	Gl12019S7	Gl13019S1
Gkl019S4	Gl1019S2	Gl2019S6	Gl3019S2	Gl4019S8	Gl5019S5	Gl6019S8	Gl7019S2	Gl8019S5	Gl9019S5	Gl10019S3	Gl11019S4	Gl12019S4	Gl13019S5		Gkl019S4	Gl1019S5	Gl2019S6	Gl3019S2	Gl4019S8	Gl5019S5	Gl6019S8	Gl7019S2	Gl8019S5	Gl9019S5	Gl10019S3	Gl11019S4	Gl12019S4	Gl13019S5
Gkl019S5	Gl1019S5	Gl2019S4	Gl3019S7	Gl4019S1	Gl5019S2	Gl6019S6	Gl7019S4	Gl8019S2	Gl9019S6	Gl10019S2	Gl11019S1	Gl12019S3	Gl13019S2		Gkl019S5	Gl1019S6	Gl2019S4	Gl3019S7	Gl4019S1	Gl5019S2	Gl6019S6	Gl7019S4	Gl8019S2	Gl9019S6	Gl10019S2	Gl11019S1	Gl12019S3	Gl13019S2
Gkl019S8	Gl1019S6	Gl2019S2	Gl3019S1	Gl4019S7	Gl5019S6	Gl6019S5	Gl7019S5	Gl8019S7	Gl9019S3	Gl10019S1	Gl11019S5	Gl12019S1	Gl13019S7		Gkl019S8	Gl1019S4	Gl2019S2	Gl3019S1	Gl4019S7	Gl5019S6	Gl6019S5	Gl7019S5	Gl8019S7	Gl9019S3	Gl10019S1	Gl11019S5	Gl12019S1	Gl13019S7
Gkl019S3	Gl1019S4	Gl2019S8	Gl3019S5	Gl4019S5	Gl5019S7	Gl6019S4	Gl7019S8	Gl8019S6	Gl9019S1	Gl10019S4	Gl11019S3	Gl12019S8	Gl13019S4		Gkl019S3		Gl2019S8	Gl3019S5	Gl4019S5	Gl5019S7	Gl6019S4	Gl7019S8	Gl8019S6		Gl10019S4	Gl11019S3	Gl12019S8	Gl13019S4
Gkl019S6	Gl1019S8						Gl7019S7	Gl8019S1			Gl11019S8	Gl12019S5			Gkl019S6				Gl4019S4	Gl5019S8			Gl8019S1			Gl11019S8	Gl12019S5
Gkl019S7
0.493686	0.568208	0.536619	0.47533	0.423425	0.575753	0.552642	0.639229	0.497298	0.464028	0.469767	0.497909	0.612364	0.459314		0.603039	0.327634	0.359848	0.33385	0.326874	0.460393	0.343226	0.258553	0.240669	0.24356	0.189671	0.307921	0.5747	0.276169
0.486989	0.540596	0.510016	0.615726	0.485612	0.435325	0.438103	0.574941	0.557736	0.544647	0.551891	0.593745	0.588879	0.466694		0.355044	0.295523	0.338681	0.407838	0.38576	0.214726	0.324138	0.318239	0.445489	0.470083	0.263214	0.341988	0.59654	0.449283
0.427738	0.564561	0.518235	0.569622	0.628144	0.463506	0.455229	0.55225	0.441847	0.561594	0.476949	0.649576	0.669142	0.493791		0.367687	0.288585	0.35709	0.438467	0.258333	0.350339	0.34023	0.245777	0.296662	0.290929	0.279593	0.313837	0.568143	0.371286
0.49887	0.602798	0.520167	0.557818	0.508539	0.443058	0.44406	0.462862	0.441931	0.698198	0.519906	0.583728	0.571077	0.460686		0.582912	0.474712	0.318229	0.307776	0.434793	0.224894	0.26482	0.184081	0.444289	0.369576	0.218475	0.368728	0.56232	0.296408
0.538524	0.485476	0.517307	0.679284	0.545578	0.487935	0.432172	0.507418	0.481206	0.655416	0.508336	0.487226	0.620295	0.473715		0.583133	0.455817	0.235988	0.472025	0.253035	0.345517	0.225158	0.188334	0.301471	0.322395	0.25501	0.29267	0.598075	0.359948
0.561326	0.609257	0.611039	0.616846	0.507603	0.442753	0.502384	0.556871	0.446456	0.460672	0.469506	0.557205	0.467944	0.49421		0.517249		0.20096	0.509902	0.35574	0.350882	0.353916	0.282728	0.214834		0.208817	0.330555	0.634796	0.423571
0.576975	0.567941						0.524606	0.562718			0.44731	0.56568			0.318384				0.283163	0.391552			0.321438			0.323514	0.501735
0.502916
