# Supplementary material for: Nonspecific stress response to temperature increase in Gammarus lacustris Sars with respect to oxygen-limited thermal tolerance concept
Source: PeerJ. 2018 Sep 17;6:e5571. doi: 10.7717/peerj.5571 (PMC6147124; doi:10.7717/peerj.5571)
Supplement: Supplemental Information 5 [file peerj-06-5571-s005.xlsx]

## Sheet: HSP70
																				1 replication										2 replication												4 replication
			HSP70																	Data from the ImageJ package (v.1.41., Wayne Rasband, NIH, USA).										Data from the ImageJ package (v.1.41., Wayne Rasband, NIH, USA).												Data from the ImageJ package (v.1.41., Wayne Rasband, NIH, USA).
																									Numbers used for statistics											Numbers used for statistics											Numbers used for statistics
	Control 7°C	9°C	11°C	13°C	15°C	17°C	19°C	21°C	23°C	25°C	27°C	29°C	31°C	33°C			hsp	background	hsp-background		actin	background	actin-background	hsp/actin	hsp/actin/ internal control			hsp	background	hsp - background		actin	background	actin - background	hsp/actin	hsp/actin/ internal control			hsp	background	hsp - background		actin	background	actin - background	hsp/actin	hsp/actin/ internal control
	Glk022s1	Gl1022s1	Gl2022s1	Gl3022s1	Gl4022s1	Gl5022s1	Gl6022s1	Gl7022s1	Gl8022s1	Gl9022s1	Gl10022s1	Gl11022s1	Gl12022s1	Gl13022s1			0.0270799	0.0268559	0.00022402	Internal control	0.253978	0.252019	0.00195968	0.114315				0.0656302	0.065451	0.00017921	Internal K	0.044741	0.044409	0.00033204	0.539724				0.0532166	0.0528448	0.00037179	internal control	0.341213	0.337848	0.00336518	0.110481
	Glk022s2	Gl1022s2	Gl2022s2	Gl3022s2	Gl4022s2	Gl5022s2	Gl6022s2	Gl7022s2	Gl8022s2	Gl9022s2	Gl10022s2	Gl11022s2	Gl12022s2	Gl13022s2		Glk022s1	0.0423738	0.0416031	0.00077062	K	0.353251	0.345953	0.00729815	0.105591	0.923689		Glk022s2	0.0557257	0.0556163	0.00010938	K	0.574321	0.572521	0.00179969	0.0607771	0.112608		Glk022s4				K
	Glk022s3	Gl1022s3	Gl2022s3	Gl3022s3	Gl4022s3	Gl5022s3	Gl6022s3	Gl7022s3	Gl8022s3	Gl9022s3	Gl10022s3	Gl11022s3	Gl12022s3	Gl13022s3		Gl1022s1	0.0455094	0.0453074	0.00020207	9°C	0.294746	0.290875	0.003871	0.052201	0.456643		Gl1022s2	0.0462933	0.0461529	0.00014031	9°C	0.398193	0.394438	0.00375463	0.0373699	0.0692388		Gl1022s4	0.0575273	0.0570967	0.00043054	9°C	0.442216	0.43109	0.0111252	0.0386994	0.350279
	Glk022s4	Gl1022s4	Gl2022s4	Gl3022s4	Gl4022s4	Gl5022s4	Gl6022s4	Gl7022s4	Gl8022s4	Gl9022s4	Gl10022s4	Gl11022s4	Gl12022s4	Gl13022s4		Gl2022s1	0.0453556	0.0451496	0.00020594	11°C	0.305006	0.298218	0.00678795	0.0303391	0.2654		Gl2022s2	0.0666669	0.0665294	0.0001375	11°C	0.337112	0.332975	0.004137	0.0332366	0.0615808		Gl2022s4	0.0521307	0.0516515	0.00047925	11°C	0.393218	0.387453	0.00576525	0.0831274	0.75241
		Gl1022s5	Gl2022s5	Gl3022s5	Gl4022s5	Gl5022s5	Gl6022s5	Gl7022s5	Gl8022s5	Gl9022s5	Gl10022s5	Gl11022s5	Gl12022s5	Gl13022s5		Gl3022s1	0.0270799	0.0268559	0.00022402	13°C	0.253978	0.252019	0.00195968	0.114315			Gl3022s2	0.0533874	0.0531724	0.00021496	13°C	0.376136	0.373582	0.00255423	0.0841584	0.155929		Gl3022s4	0.0394066	0.0390886	0.00031793	13°C	0.365464	0.358813	0.00665156	0.0477978	0.432632
																Gl4022s1	0.0405702	0.0403821	0.00018817	15°C	0.259459	0.25498	0.00447962	0.0420058	0.367458		Gl4022s2	0.0588255	0.0586305	0.00019497	15°C	0.330651	0.326665	0.00398649	0.0489077	0.0906161		Gl4022s4	0.0459365	0.045562	0.00037446	15°C	0.42991	0.41957	0.0103404	0.0362133	0.327777
	0.923689	0.456643	0.2654		0.367458	0.219808	0.488418	0.222045	0.207454	0.331122	0.316837	0.315865	0.275928	0.251768		Gl5022s1	0.0291827	0.02905	0.00013267	17°C	0.293789	0.288509	0.00527992	0.0251273	0.219808		Gl5022s2	0.0720433	0.0718497	0.00019355	17°C	0.345799	0.342275	0.00352441	0.054917	0.10175		Gl5022s4	0.0428878	0.0424057	0.00048206	17°C	0.3629	0.352936	0.00996444	0.048378	0.437884
	0.112608	0.0692388	0.062	0.155929	0.0906161	0.10175	0.156219	0.124868	0.0482872	0.149426	0.0518158	0.101221	0.240818	0.190385		Gl6022s1	0.0332871	0.0329995	0.00028761	19°C	0.300206	0.295055	0.00515123	0.0558333	0.488418		Gl6022s2	0.0652292	0.0647827	0.00044648	19°C	0.367935	0.362639	0.00529538	0.084315	0.156219		Gl6022s4	0.0407728	0.0405103	0.00026251	19°C	0.359927	0.351702	0.00822484	0.0319167	0.288888
	0.293946	0.178242	0.114585	0.218403	0.128565	0.153215	0.343084	0.0829666	0.100595	0.0788832	0.12412	0.067148	0.0976841	0.108736		Gl7022s1	0.0438158	0.0436002	0.00021564	21°C	0.327997	0.319501	0.00849547	0.0253829	0.222045		Gl7022s2	0.0400162	0.0397537	0.0002624	21°C	0.342943	0.33905	0.0038935	0.0673944	0.124868		Gl7022s4	0.069766	0.0694002	0.00036587	21°C	0.477589	0.466224	0.0113652	0.0321922	0.291381
	0.303136	0.350279	0.75241	0.432632	0.327777	0.437884	0.288888	0.291381	0.692421	0.451733	0.471424	0.378036	0.202724	0.729451		Gl8022s1	0.0370312	0.0367673	0.00026386	23°C	0.372128	0.361002	0.0111263	0.023715	0.207454		Gl8022s2	0.0422791	0.0421668	0.00011229	23°C	0.319928	0.315619	0.00430861	0.0260618	0.0482872		Gl8022s4	0.0570395	0.056647	0.00039253	23°C	0.431133	0.426002	0.00513113	0.0764997	0.692421
		0.271627	0.31595	1.05279	0.909922	0.566337	1.08229	0.37214	0.408662	0.754714	0.746579	0.674618	0.386953	0.364738		Gl9022s1	0.0344864	0.0341634	0.00032301	25°C	0.253704	0.245171	0.00853347	0.0378521	0.331122		Gl9022s2	0.0553933	0.0550837	0.0003096	25°C	0.296373	0.292534	0.00383887	0.0806487	0.149426		Gl9022s4	0.055614	0.0551717	0.00044225	25°C	0.419339	0.410478	0.00886128	0.0499081	0.451733
																Gl10022s1	0.0334601	0.0330992	0.00036089	27°C	0.313192	0.303228	0.00996408	0.0362191	0.316837		Gl10022s2	0.0503388	0.0501917	0.00014706	27°C	0.370744	0.365485	0.00525848	0.0279663	0.0518158		Gl10022s4	0.065493	0.0649648	0.0005283	27°C	0.487639	0.477496	0.0101433	0.0520836	0.471424
																Gl11022s1	0.0297273	0.0294717	0.00025561	29°C	0.30701	0.299931	0.00707905	0.036108	0.315865		Gl11022s2	0.033433	0.0331991	0.00023384	29°C	0.328145	0.323865	0.00428034	0.0546312	0.101221		Gl11022s4	0.0574439	0.0569847	0.00045924	29°C	0.46714	0.456145	0.0109956	0.0417659	0.378036
																Gl12022s1	0.0366082	0.0363192	0.00028906	31°C	0.282894	0.27373	0.00916413	0.0315425	0.275928		Gl12022s2	0.0441508	0.0437229	0.00042791	31°C	0.328717	0.325425	0.00329224	0.129975	0.240818		Gl12022s4	0.0489536	0.0486333	0.00032025	31°C	0.414919	0.40062	0.0142987	0.0223972	0.202724
																Gl13022s1	0.0476111	0.0473389	0.00027225	33°C	0.327207	0.317748	0.00945945	0.0287807	0.251768		Gl13022s2	0.0411115	0.0407534	0.0003581	33°C	0.310429	0.306944	0.00348498	0.102755	0.190385		Gl13022s4	0.0500391	0.0491127	0.00092643	33°C	0.444237	0.432741	0.0114955	0.0805908	0.729451
																														3 replication												5 replication
																														Data from the ImageJ package (v.1.41., Wayne Rasband, NIH, USA).												Data from the ImageJ package (v.1.41., Wayne Rasband, NIH, USA).
																																				Numbers used for statistics											Numbers used for statistics
																												hsp	background	hsp - background		actin	background	actin - background	hsp/actin	hsp/actin/ internal control			HSP	фон	hsp - фон		ACTIN	фон	actin - фон	hsp/actin	hsp/actin/ internal control
																												0.0656302	0.065451	0.00017921	Internal K	0.044741	0.044409	0.00033204	0.539724				0.0532166	0.0528448	0.00037179	intermal control	0.341213	0.337848	0.00336518	0.110481
																											Glk022s3	0.0688189	0.0683444	0.00047444	K	0.657748	0.654757	0.00299049	0.15865	0.293946		Glk022s5	0.0637089	0.0633628	0.00034609	K	0.473808	0.463474	0.0103338	0.0334909	0.303136
																											Gl1022s3	0.0545085	0.0542241	0.00028442	9°C	0.422129	0.419173	0.00295651	0.0962013	0.178242		Gl1022s5	0.048391	0.0481203	0.00027077	9°C	0.419112	0.410089	0.00902273	0.0300098	0.271627
																											Gl2022s3	0.0585698	0.0581491	0.00042079	11°C	0.503335	0.496531	0.006804	0.0618445	0.114585		Gl2022s5	0.0513618	0.0511057	0.00025615	11°C	0.390899	0.383561	0.00733816	0.0349066	0.31595
																											Gl3022s3	0.0568737	0.0563601	0.00051362	13°C	0.459712	0.455355	0.00435724	0.117877	0.218403		Gl3022s5	0.0735099	0.073135	0.00037485	13°C	0.370877	0.367654	0.00322274	0.116314	1.05279
																											Gl4022s3	0.0565539	0.0562316	0.0003223	15°C	0.478501	0.473856	0.00464479	0.0693896	0.128565		Gl4022s5	0.0680873	0.0676757	0.00041156	15°C	0.441807	0.437713	0.00409392	0.10053	0.909922
																											Gl5022s3	0.0556523	0.0551322	0.0005201	17°C	0.527778	0.521488	0.00628945	0.082694	0.153215		Gl5022s5	0.0706752	0.0703184	0.00035686	17°C	0.398325	0.392622	0.0057034	0.0625697	0.566337
																											Gl6022s3	0.055313	0.0547376	0.00057545	19°C	0.477057	0.473949	0.00310767	0.185171	0.343084		Gl6022s5	0.0622985	0.0618986	0.00039994	19°C	0.430706	0.427362	0.00334475	0.119572	1.08229
																											Gl7022s3	0.0532156	0.0529271	0.00028852	21°C	0.446926	0.440483	0.00644319	0.0447791	0.0829666		Gl7022s5	0.0565675	0.0562665	0.000301	21°C	0.434804	0.427483	0.00732101	0.0411145	0.37214
																											Gl8022s3	0.0659169	0.0655424	0.00037448	23°C	0.443948	0.43705	0.00689734	0.0542934	0.100595		Gl8022s5	0.058488	0.0579708	0.00051721	23°C	0.529418	0.517962	0.0114555	0.0451495	0.408662
																											Gl9022s3	0.0620018	0.061743	0.00025888	25°C	0.35675	0.350669	0.00608054	0.0425752	0.0788832		Gl9022s5	0.0820513	0.0814119	0.00063942	25°C	0.468956	0.461288	0.00766857	0.0833819	0.754714
																											Gl10022s3	0.0726525	0.0723652	0.00028726	27°C	0.452888	0.4486	0.00428808	0.0669904	0.12412		Gl10022s5	0.0689056	0.0684399	0.00046561	27°C	0.529829	0.524184	0.00564491	0.0824832	0.746579
																											Gl11022s3	0.0750887	0.0748641	0.00022451	29°C	0.565576	0.559381	0.00619485	0.0362414	0.067148		Gl11022s5	0.0687716	0.0681676	0.00060404	29°C	0.521097	0.512993	0.00810435	0.0745328	0.674618
																											Gl12022s3	0.0779089	0.0776592	0.00024968	31°C	0.461338	0.456602	0.00473574	0.0527225	0.0976841		Gl12022s5	0.0672746	0.0668752	0.00039939	31°C	0.421944	0.412602	0.0093422	0.0427512	0.386953
																											Gl13022s3	0.0645366	0.0642368	0.00029984	33°C	0.430997	0.425888	0.0051091	0.0586874	0.108736		Gl13022s5	0.0422107	0.0418569	0.00035379	33°C	0.437056	0.428276	0.00877962	0.0402967	0.364738
